# Supplementary material
Source: PubMed Central journal article supplement (PMC9012677)
Supplement: NIHMS1778039-supplement-1.pdf [file NIHMS1778039-supplement-1.pdf]

**Supp File 1**

**Patient demographics and medical condition**

| Sample   | Age | Race  | Gender | Medical Condition    |
|----------|-----|-------|--------|----------------------|
| Control  | 40  | White | M      | none                 |
| Control  | 31  | Asian | M      | none                 |
| Control  | 30  | Asian | M      | none                 |
| Control  | 30  | White | F      | none                 |
| Control  | 39  | White | F      | none                 |
| Control  | 25  | White | M      | none                 |
| COVID-19 | 57  | Black | F      | COVID-19+Sepsis      |
| COVID-19 | 63  | Black | M      | COVID-19+Sepsis      |
| COVID-19 | 68  | Black | M      | COVID-19             |
| COVID-19 | 54  | Black | M      | COVID-19+ARDS+Sepsis |
| COVID-19 | 71  | Black | M      | COVID-19+ARDS+Sepsis |
| COVID-19 | 65  | Black | M      | COVID-19+ARDS+Sepsis |

**WBC, RBC and platelet count of 6 COVID-19 sample used for ChIP-seq and RNA-seq**

|                | WBC<br>x10 <sup>3</sup> /ul | Neutrophil (%)<br>x10 <sup>3</sup> /ul | Lymphocyte(%)<br>x10 <sup>3</sup> /ul | Monocyte(%)<br>x10 <sup>3</sup> /ul | Eosinophil(%)<br>x10 <sup>3</sup> /ul | Basophil(%)<br>x10 <sup>3</sup> /ul | RBC<br>x10 <sup>6</sup> /ul | Platelet<br>x10 <sup>3</sup> /ul |
|----------------|-----------------------------|----------------------------------------|---------------------------------------|-------------------------------------|---------------------------------------|-------------------------------------|-----------------------------|----------------------------------|
| Normal Range * | 4.5-11.0                    | 1.8-7.0<br>(40%-80%)                   | 1.0-4.8<br>(25%-35%)                  | 0.1-0.8<br>(2%-10%)                 | <0.4<br>(0%-5%)                       | <0.2<br>(0%-1%)                     | 4.0-5.5                     | 150-350                          |
| Patient        |                             |                                        |                                       |                                     |                                       |                                     |                             |                                  |
| 1              | 24.8                        | 19.72 (79.5%)                          | 2.76 (11.1%)                          | 1.89 (7.6%)                         | 0.02 (0.1%)                           | 0.06 (0.2%)                         | 3.70                        | 431                              |
| 2              | 27.4                        | 21.38 (78.1%)                          | 2.05 (7.5%)                           | 2.49 (9.1%)                         | 0.00 (0.0%)                           | 0.07 (0/3%)                         | 4.51                        | 224                              |
| 3              | 17.3                        | 15.14 (87.3%)                          | 1.42 (8.2%)                           | 0.33 (1.9%)                         | 0.19 (1.1%)                           | 0.01 (0.1%)                         | 3.59                        | 109                              |
| 4              | 8.4                         | 7.13 (84.7%)                           | 0.78 (9.3%)                           | 0.45 (5.3%)                         | 0.00 (0.0%)                           | 0.01(0.1%)                          | 5.10                        | 185                              |
| 5              | 15.5                        | 12.89 (83.2%)                          | 0.56 (3.6%)                           | 1.76 (11.3%)                        | 0.02 (0.1%)                           | 0.02(0.1%)                          | 3.81                        | 277                              |
| 6              | 13.3                        | 9.10 (68.3%)                           | 2.37 (17.8%)                          | 1.36 (10.2%)                        | 0.00 (0.0%)                           | 0.03 (0.2%)                         | 4.36                        | 306                              |

\*McKenzie, S.B. and Williams, J.L. Clinical Laboratory Hematology, 2<sup>nd</sup> edition. 2010
